# Supplementary material for: Ultrahigh carrier mobility and multidirectional piezoelectricity in 2D Janus copper-containing chalcogenide monolayers
Source: Royal Society of Chemistry journal article supplement (doi:10.1039/d4cp04128c), 2024-12-24
Supplement: d4cp04128c1.pdf [file d4cp04128c1.pdf]

*Electronic supplementary information for*

**Ultrahigh carrier mobility and multidirectional piezoelectricity in 2D Janus copper-containing chalcogenides monolayers**

Mengbing Liu,<sup>a</sup> Xingxu Meng,<sup>a</sup> Yuli Yan,<sup>a</sup> and Huabing Yin<sup>a,\*</sup>

<sup>a</sup>*Institute for Computational Materials Science, Joint Center for Theoretical Physics, and Key Laboratory for High Efficiency Energy Conversion Science and Technology of Henan Province, School of Physics and Electronics, Henan University, Kaifeng 475004, China*

\*E-mail: yhb@henu.edu.cn (Huabing Yin)

**Crystal structure data**

The following POSCAR files contain the structures of perfect CuP<sub>2</sub>Se and Janus CuP<sub>2</sub>Se<sub>0.5</sub>S<sub>0.5</sub> and CuP<sub>2</sub>Te<sub>0.5</sub>Se<sub>0.5</sub> monolayers.

1. POSCAR of perfect CuP<sub>2</sub>Se monolayer:

CuP<sub>2</sub>Se

```
1.0000000000000000
 5.5899080641661039  0.0000000000000000  0.0000000000000000
 0.0000000000000000  6.4504556729256981  0.0000000000000000
 0.0000000000000000  0.0000000000000000  26.0000000000000000
```

```
Se Cu P
 4 4 8
```

Direct

```
0.0053013449331019  0.2462055813778292  0.2008942831013414
0.9946986672637621  0.7537943888961820  0.4364133974755831
0.5053013328432314  0.2537944186914416  0.4364133974755831
0.4946986672281000  0.7462055515825696  0.2008942831013414
0.1656701645168468  0.9273256967525825  0.2405119947159449
0.8343298205758742  0.0726743181642888  0.3967956668609816
0.6656701793528015  0.5726743031473589  0.3967956668609816
0.3343298205402121  0.4273256968372507  0.2405119947159449
0.3036626577344563  0.9802806909830863  0.3212780231499863
0.6963373125579793  0.0197193183919140  0.3160296764269361
0.8036626875490072  0.5197193090707941  0.3160296764269361
0.1963373572798091  0.4802806909138155  0.3212780231499863
0.6962833273027371  0.2840855898392007  0.2586693260274373
```

0.3037166727685872 0.7159144101454018 0.3786383355494891  
0.1962833422456782 0.2159144100761310 0.3786383355494891  
0.8037166728042564 0.7840855899084715 0.2586693260274373

## 2. POSCAR of Janus $\text{CuP}_2\text{Se}_{0.5}\text{S}_{0.5}$ monolayer:

CuP2Se0.5S0.5

1.0000000000000000  
5.5201774925771447 0.0000000000000000 0.0000000000000000  
0.0000000000000000 6.4484397315325523 0.0000000000000000  
0.0000000000000000 0.0000000000000000 26.0000000000000000

Se S Cu P  
2 2 4 8

Direct

0.0032390939102172 0.2447440849883762 0.2008578421818470  
0.4967609205086418 0.7447440699972887 0.2008578421818470  
0.9877479889342382 0.7566336368353674 0.4305489727930976  
0.5122520110299789 0.2566336070237227 0.4305489727930976  
0.1687832485293512 0.9285798605717872 0.2407310432342697  
0.8373662713933498 0.0740788031514015 0.3981460947627085  
0.6626337285708672 0.5740787881603140 0.3981460947627085  
0.3312167365508856 0.4285798307601425 0.2407310432342697  
0.3033255224261779 0.9801877973097888 0.3223885962261335  
0.7005697305064587 0.0168982052449067 0.3165707818934962  
0.7994302694577655 0.5168982237395952 0.3165707818934962  
0.1966744775022633 0.4801878270284163 0.3223885962261335  
0.6936131338040639 0.2809295901594453 0.2591939849455045  
0.2905509219112119 0.7179480630380510 0.3807927081552620  
0.2094490781961227 0.2179480481089797 0.3807927081552620  
0.8063868661601532 0.7809295602857915 0.2591939849455045

## 3. POSCAR of Janus $\text{CuP}_2\text{Te}_{0.5}\text{Se}_{0.5}$ monolayer:

CuP2Te0.5Se0.5

1.0000000000000000  
5.6852584372223260 0.0000000000000000 0.0000000000000000  
0.0000000000000000 6.4785399647393076 0.0000000000000000  
0.0000000000000000 0.0000000000000000 26.0000000000000000

Se Te Cu P  
2 2 4 8

Direct

0.0082315020946169 0.2463833818084424 0.2010900565668621  
0.4917685123242421 0.7463833668173550 0.2010900565668621  
0.0032173935454480 0.7526643343490136 0.4434204055703006

0.4967826064187761 0.2526643045373689 0.4434204055703006  
0.1613242035012163 0.9248272211390471 0.2401435285607789  
0.8301073622443980 0.0709981331064640 0.3955477886667964  
0.6698926377198191 0.5709981181153765 0.3955477886667964  
0.3386757815790205 0.4248271913273953 0.2401435285607789  
0.3037432092183394 0.9803927279114646 0.3198042698921100  
0.6903079395094309 0.0231340808031604 0.3152946338929752  
0.8096920604547932 0.5231340992978559 0.3152946338929752  
0.1962567907101018 0.4803927576300921 0.3198042698921100  
0.7001634411820419 0.2876801272538643 0.2581210797482925  
0.3181992451306854 0.7139200349276749 0.3758082612941891  
0.1818007549766492 0.2139200199986035 0.3758082612941891  
0.7998365587821752 0.7876800973802034 0.2581210797482925
